# Supplementary material for: Isolation and Functional Characterization of the Promoters of Miltiradiene Synthase Genes, TwTPS27a and TwTPS27b, and Interaction Analysis with the Transcription Factor TwTGA1 from Tripterygium wilfordii
Source: PubMed Central journal article supplement (PMC7926782; doi:10.3390/plants10020418), 2021-02-23
Supplement: plants-10-00418-s001.pdf [file plants-10-00418-s001.pdf]

## Supplementary Materials

**Table S1.** Prediction of the *cis*-regulatory elements in the *TwTPS27a/b* promoters

| Site name             | Numbers of |      | Sequence       | Function                                                                               |
|-----------------------|------------|------|----------------|----------------------------------------------------------------------------------------|
|                       | 27aP       | 27bP |                |                                                                                        |
| TGACG-motif           | 2          | 2    | TGACG          | Cis-acting regulatory element involved in the meja-responsiveness                      |
| PYRIMIDINEBOXHVEPB1   | 1          | 1    | TTTTTTCC       | Required for GA induction, pyrimidine box                                              |
| PYRIMIDINEBOXOSRAMY1A | 1          | 0    | CCTTTT         | Gibberellin-response cis-element, pyrimidine box                                       |
| W-box                 | 3          | 7    | TTGAC(T/C)     | WRKY recognition site, salicylic acid (SA)-responsiveness                              |
| E-box                 | 3          | 4    | CANNTG         | MYC recognition sequence, meja-responsiveness                                          |
| T/G-box               | 1          | 0    | CACGTT         | MYC recognition sequence, meja-responsiveness                                          |
| MYB1AT                | 1          | 2    | (T/A)AACCA     | MYB recognition site, dehydration-responsive                                           |
| MYB2AT                | 1          | 0    | TAACTG         | MYB recognition sequence, dehydration-responsive                                       |
| MYB1LEPR              | 1          | 1    | GTTAGTT        | Cis elements of Myb1                                                                   |
| MYBPZM                | 1          | 1    | CCAACC         | Core of consensus maize P (myb homolog) binding site                                   |
| MYBST1                | 3          | 2    | GGATA          | Core motif of mybst1 (a potato MYB homolog) binding site                               |
| MYBCORE               | 2          | 5    | C(G/C)GTT(A/G) | CNGTTR, MYB recognition site, dehydration-responsive                                   |
| ABRE                  | 1          | 0    | ACGTG          | Abscisic acid responsiveness                                                           |
| RAV1AAT               | 2          | 6    | CAACA          | The AP2-like domain recognize the CAACA motif; ethylene-responsive                     |
| CAATBOX1              | 27         | 35   | CAAT           | Play a key role in transcription initiation                                            |
| CTRMCAMV35S           | 0          | 1    | TCTCTCTCT      | CT-rich motif, can enhance gene expression                                             |
| AAGAA-motif           | 1          | 1    | GAAAGAA        | Light responsive element                                                               |
| AE-box                | 2          | 2    | AGAAACAA       | Part of a module for light response                                                    |
| Box 4                 | 2          | 1    | ATTAAT         | Part of a conserved DNA module involved in light responsiveness                        |
| GA-motif              | 1          | 1    | ATAGATAA       | Part of a light responsive element                                                     |
| GT1-motif             | 1          | 2    | GGTTAA         | Light responsive element                                                               |
| I-box                 | 1          | 0    | TAGATAACC      | Part of a light responsive element                                                     |
| GATABOX               | 11         | 16   | GATA           | Light regulated, and tissue specific expression                                        |
| IBOX                  | 2          | 2    | GATAAG         | Light responsive element                                                               |
| IBOXCORE              | 5          | 6    | GATAA          | Light responsive element                                                               |
| SORLIP1AT             | 1          | 1    | GCCAC          | One of "Sequences Over-Represented in Light-Induced Promoters (sorlips) in Arabidopsis |
| SORLIP2AT             | 0          | 2    | GGGCC          | One of "Sequences Over-Represented in Light-Induced Promoters (sorlips)                |

|                   |    |    |           |                                                                                      |
|-------------------|----|----|-----------|--------------------------------------------------------------------------------------|
| SORLIP5AT         | 1  | 0  | GAGTGAG   | Light responsive element                                                             |
| TBOXATGAPB        | 0  | 1  | ACTTTG    | Mutations in the "Tbox" resulted in reductions of light-activated gene transcription |
| TCCC-motif        | 2  | 1  | TCTCCCT   | Part of a light responsive element                                                   |
| TCT-motif         | 0  | 1  | TCTTAC    | Part of a light responsive element                                                   |
| ACGTATERD1        | 6  | 4  | ACGT      | Required for etiolation-induced expression                                           |
| ARE               | 1  | 1  | TGGTTT    | Essential for the anaerobic induction                                                |
| CBFHV             | 1  | 2  | RYCGAC    | Dehydration-responsive element (DRE) binding proteins                                |
| CCAATBOX1         | 3  | 4  | CCAAT     | HSE (Heat shock element); CCAAT box                                                  |
| CURECORECR        | 3  | 2  | GTAC      | Copper-response element                                                              |
| ELRECOREPCR1      | 1  | 4  | TTGACC    | Fungal elicitor responsive element                                                   |
| GT1GMSCAM4        | 6  | 9  | GAAAAA    | Plays a role in pathogen- and salt-induced                                           |
| LTRECOREATCOR15   | 1  | 1  | CCGAC     | Low-temperature response                                                             |
| SURE1STPAT21      | 1  | 2  | AATAGAAAA | Sucrose responsive element (sure)                                                    |
| SURECOREATSULTR11 | 1  | 2  | GAGAC     | Core of sulfur-responsive element (SURE) found in the promoter of SULTR1             |
| AACACOREOSGLUB1   | 1  | 1  | AACAAAC   | endosperm-specific expression                                                        |
| AACACOREOSGLUB1   | 1  | 1  | AACAAAC   | endosperm-specific expression                                                        |
| GCN4_motif        | 0  | 1  | TGAGTCA   | cis-regulatory element involved in endosperm expression                              |
| OSE1ROOTNODULE    | 3  | 4  | AAAGAT    | organ-specific elements, activated in infected cells of root nodules                 |
| OSE2ROOTNODULE    | 5  | 8  | CTCTT     | organ-specific elements, activated in infected cells of root nodules                 |
| ROOTMOTIFTAPOX1   | 14 | 12 | ATATT     | root-specific expression                                                             |
| RYREPEATBNNAPA    | 1  | 2  | CATGCA    | Seed-specific expression                                                             |

**Table S2.** The results of local BLAST for query sequence of *TwTPS27* (KU948698)

| Transcriptome | Matched sequence                     | Score(bits) | E-value | Length(bp) |
|---------------|--------------------------------------|-------------|---------|------------|
| SRX472292     | <i>comp34029_c1_seq3</i>             | 1095        | 0.0     | 2562       |
| SRX202900     | <i>Tw_comp37092_c0_seq1_len=2086</i> | 1180        | 0.0     | 2086       |
| SRX472292     | <i>comp27356_c0_seq1</i>             | 295         | 5e-080  | 375        |
| SRX202900     | <i>Tw_comp37092_c0_seq1_len=2086</i> | 256         | 9e-068  | 2086       |

**Table S3.** Primers used in this study

| Primers                              | Sequence (5' to 3')                                            | Use for                     |
|--------------------------------------|----------------------------------------------------------------|-----------------------------|
| <b>Full-length cDNA and gDNA PCR</b> |                                                                |                             |
| <i>TwTPS27</i> -UTR-F                | AAGTTTGGTTTCTTGCATCCAAAATC                                     | cDNA-PCR and<br>gDNA-PCR    |
| <i>TwTPS27</i> -UTR-R                | GATGTCCAAACTACTTATTTGCTAA                                      |                             |
| <b>5'/3'-RACE PCR</b>                |                                                                |                             |
| <i>TwTPS27</i> -5'-R1-624            | CTCTTTGGCTTCATCTAAAATAACT                                      | 1 <sup>st</sup> 5'-RACE PCR |
| <i>TwTPS27</i> -5'-R2-302            | TCAGAGGTGGACGCAAGCAATC                                         | 2 <sup>nd</sup> 5'-RACE PCR |
| <i>TwTPS27</i> -3'-F1-974            | CCAAAGCCAGAATAGCAGCAAC                                         | 1 <sup>st</sup> 3'-RACE PCR |
| <i>TwTPS27</i> -3'-F2-1422           | GCTACTCTACTGGTCGTCGTCAT                                        | 2 <sup>nd</sup> 3'-RACE PCR |
| <b>Site Finding-PCR</b>              |                                                                |                             |
| Site Finder-1                        | CACGACACGCTACTCAACACACCACCTCGCACAGCGTCCTCAACCTGCAGGIBIHIGCTC   | Initial PCR                 |
| Site Finder-2                        | CACGACACGCTACTCAACACACCACCTCGCACAGCGTCCTCAAGCGGCCGCNNNNNNNGCTC | Initial PCR                 |
| Site Finder-3                        | CACGACACGCTACTCAACACACCACCTCGCACAGCGTCCTCAACTCGAGNNNNNNNAGCT   | Initial PCR                 |
| SFP1                                 | CACGACACGCTACTCAACAC                                           | 1 <sup>st</sup> PCR         |
| SFP2                                 | ACTCAACACACCACCTCGCACAGC                                       | 2 <sup>nd</sup> PCR         |
| SFP3                                 | CACCTCGCACAGCGTCCTCA                                           | 3 <sup>rd</sup> PCR         |
| 27pro1                               | CGTAGGATGCGGAACCTCAATGC                                        | 1 <sup>st</sup> PCR         |
| 27pro2                               | GCAATCTCTTGGCATCTTGCCCTC                                       | 2 <sup>nd</sup> PCR         |
| 27pro3                               | TGTAGGGAGTGTTCAAGGAGTCG                                        | 3 <sup>rd</sup> PCR         |
| 27pro4                               | ATCATTGCGGAAGAAAAGAGAACTT                                      | 1 <sup>st</sup> PCR         |
| 27pro5                               | TCATCCAAACAAGTCATTCAACATA                                      | 2 <sup>nd</sup> PCR         |
| 27pro6                               | GCTGCCAGGGGCGAAACT                                             | 3 <sup>rd</sup> PCR         |
| <b>FPNI-PCR</b>                      |                                                                |                             |
| FP1                                  | GTAATACGACTCACTATAGGGCACGCGTGGTNTCGASTWTSWGTT                  | 1 <sup>st</sup> PCR         |
| FP2                                  | GTAATACGACTCACTATAGGGCACGCGTGGTNGTCGASWGANAWGAA                | 1 <sup>st</sup> PCR         |
| FP3                                  | GTAATACGACTCACTATAGGGCACGCGTGGTWGTGNAGWANCANAGA                | 1 <sup>st</sup> PCR         |
| FP4                                  | GTAATACGACTCACTATAGGGCACGCGTGGTAGWGNAGWANCAWAGG                | 1 <sup>st</sup> PCR         |
| FP5                                  | GTAATACGACTCACTATAGGGCACGCGTGGTNGTAWAASGTNTSCAA                | 1 <sup>st</sup> PCR         |
| FP6                                  | GTAATACGACTCACTATAGGGCACGCGTGGTNGACGASWGANAWGAC                | 1 <sup>st</sup> PCR         |
| FP7                                  | GTAATACGACTCACTATAGGGCACGCGTGGTNGACGASWGANAWGAA                | 1 <sup>st</sup> PCR         |

|                                     |                                                                |                  |
|-------------------------------------|----------------------------------------------------------------|------------------|
| FP8                                 | GTAATACGACTCACTATAGGGCACGCGTGGTGTNCGASWCANAWGTT                | 1st PCR          |
| FP9                                 | GTAATACGACTCACTATAGGGCACGCGTGGTNCAGCTWSCTNTSCTT                | 1st PCR          |
| FSP1                                | GTAATACGACTCACTATAGGGC                                         | 2nd PCR          |
| FSP2                                | ACTATAGGGCACGCGTGGT                                            | 3rd PCR          |
| XXR494                              | CCCGTTTAGCTTTGCCCAATGTGAC                                      | 1st PCR          |
| XXR410                              | TGAAGAGGGAGAGAGGCGTGAGGTA                                      | 2nd PCR          |
| XXR358                              | AGAGGGGCTTGAGGTAGAAGATGAT                                      | 3rd PCR          |
| <b>Full-length Promoter cloning</b> |                                                                |                  |
| Pro-1-F                             | GTAAGTGAATAAATAAATTAATTTGCTACAGTTATCG                          | sense primer     |
| Pro-2-F                             | TGGGCCCTCTTTATTGAAAACAAAAAT                                    | sense primer     |
| Pro-R                               | AATCCCAGAAGAAAGGTGTGATTTT                                      | antisense primer |
| <b>Promoter::GUS construction</b>   |                                                                |                  |
| 27aP-F                              | <u>GACCATGATTACGCCAAGCTT</u> GTAAGTGAATAAATAAATTTGCTACAGTTATCG | sense primer     |
| 27bP-1-F                            | <u>GACCATGATTACGCCAAGCTT</u> TGGGCCCTCTTTATTGAAAACAAAAAT       | sense primer     |
| 27bP-2-F                            | <u>GACCATGATTACGCCAAGCTT</u> CTCTTCAATCTTTCTTTTATGTCAC         | sense primer     |
| 27bP-3-F                            | <u>GACCATGATTACGCCAAGCTT</u> TAACTTGTAGGACAAATAGAGAAC          | sense primer     |
| 27bP-4-F                            | <u>GACCATGATTACGCCAAGCTT</u> ATTAATAATTGTAGACTCGATTATTC        | sense primer     |
| 27bP-5-F                            | <u>GACCATGATTACGCCAAGCTT</u> TGACTTTAAACTTGTGACATCGA           | sense primer     |
| 27P-R                               | <u>ACCACCCGGGGATCCTCTAGAAATTCCCAGAAGAAAGGTGTGATTTT</u>         | antisense primer |
| <b>Y1H assays</b>                   |                                                                |                  |
| aPro-AbAi-F                         | <u>AAATGATGAATTGAAAAGCTTT</u> GAGTGAAATTTGATGTGTTTGACG         | bait vector      |
| aPro-AbAi-R                         | <u>AGCACATGCCTCGAGGTCGACCAAATAGTTTGAGAAGTGTACAACGTCA</u>       | bait vector      |
| aPro-m-AbAi-F                       | <u>AAATGATGAATTGAAAAGCTTT</u> GAGTGAAATTTGATGTGTTTctCt         | bait vector      |
| aPro-m-AbAi-R                       | <u>AGCACATGCCTCGAGGTCGACCAAATAGTTTGAGAAGTGTACAACGagA</u>       | bait vector      |
| bPro-AbAi-F                         | <u>AAATGATGAATTGAAAAGCTTT</u> GAGTCAAATTTGATGTGTTTGACG         | bait vector      |
| bPro-AbAi-R                         | <u>AGCACATGCCTCGAGGTCGACCAAATTGTTTGAGAAGTGGACAACGTCA</u>       | bait vector      |
| bPro-m-AbAi-F                       | <u>AAATGATGAATTGAAAAGCTTT</u> GAGTCAAATTTGATGTGTTTctCt         | bait vector      |
| bPro-m-AbAi-R                       | <u>AGCACATGCCTCGAGGTCGACCAAATTGTTTGAGAAGTGGACAACGagA</u>       | bait vector      |
| TwTGA1-AD-F                         | <u>GCCATGGAGGCCAGTGAATTC</u> ATGAACTCTCCGTCCACCC               | prey vector      |
| TwTGA1-AD-R                         | <u>ACGATTCATCTGCAGCTCGAGCT</u> ATTCTCCTTTAAACGACTGTGCAC        | prey vector      |
| <b>GUS transactivation assays</b>   |                                                                |                  |
| TwTGA1-OE-F                         | <u>TATAAAAAAAAAAAAAAGAATTC</u> ATGAACTCTCCGTCCACCC             | effector vector  |

|             |                                                        |                 |
|-------------|--------------------------------------------------------|-----------------|
| TwTGA1-OE-R | <u>ATTATTATGGAGAAAAAGCTTCTATTCTCCTTTAAACGACTGTGCAC</u> | effector vector |
| 27aP-F      | in section of Promoter::GUS construction               | reporter vector |
| 27aP-R      | in section of Promoter::GUS construction               | reporter vector |
| 27bP-F      | in section of Promoter::GUS construction               | reporter vector |
| 27bP-R      | in section of Promoter::GUS construction               | reporter vector |

**Table S4.** Reaction system of Site Finding-PCR

| Initial PCR                 |         | 1 <sup>st</sup> PCR                     |         |
|-----------------------------|---------|-----------------------------------------|---------|
| Components                  | Volume  | Components                              | Volume  |
| Genomic DNA                 | 1.0 µL  | Initial PCR product                     | 20.0 µL |
| —                           | —       | GSP1 (10 µM)                            | 1.0 µl  |
| Site Finer(n) (10 µM)       | 1.0 µl  | SF1 (100 µM)                            | 0.4 µl  |
| Premix PrimeSTAR HS         | 10.0 µl | Premix PrimeSTAR HS                     | 2.5 µl  |
| ddH <sub>2</sub> O          | 8.0 µL  | ddH <sub>2</sub> O                      | 1.1 µL  |
| Total                       | 20.0 µl | Total                                   | 25.0 µl |
| 2 <sup>nd</sup> PCR         |         | 3 <sup>rd</sup> PCR                     |         |
| Components                  | Volume  | Components                              | Volume  |
| 1 <sup>st</sup> PCR product | 1.0 µl  | Dilution of 2 <sup>nd</sup> PCR product | 1.0 µl  |
| GSP2 (10 µM)                | 1.0 µl  | GSP3 (10 µM)                            | 1.0 µl  |
| SF2 (10 µM)                 | 1.0 µl  | SF3 (10 µM)                             | 1.0 µl  |
| Premix PrimeSTAR HS         | 12.5 µl | Premix PrimeSTAR HS                     | 12.5 µl |
| ddH <sub>2</sub> O          | 9.5 µL  | ddH <sub>2</sub> O                      | 9.5 µL  |
| Total                       | 25.0 µl | Total                                   | 25.0 µl |

**Table S5.** Reaction procedures of SiteFinding-PCR

| Reactions           | Circles | Conditions of temperature                        |
|---------------------|---------|--------------------------------------------------|
| Initial PCR         | 1       | 94°C 5 min                                       |
|                     | 1       | 98°C 1 min; 25°C 1 min; 0.3°C /s heat up to 68°C |
|                     | 1       | 68°C 10 min                                      |
| 1 <sup>st</sup> PCR | 1       | 94°C 5 min                                       |
|                     | 30      | 98°C 10 s; 55°C 5 s; 68°C 4 min                  |
|                     | 1       | 72°C 5 min                                       |
| 2 <sup>nd</sup> PCR | 1       | 94°C 5 min                                       |
|                     | 30      | 98°C 10 s; 55°C 5 s; 68°C 3 min                  |
|                     | 1       | 72°C 5 min                                       |
| 3 <sup>rd</sup> PCR | 1       | 94°C 5 min                                       |
|                     | 30      | 98°C 10 s; 55°C 5 s; 68°C 2 min                  |
|                     | 1       | 72°C 5 min                                       |

**Table S6.** Reaction system of fusion primer and nested integrated-PCR (FPNI-PCR)

| 1 <sup>st</sup> PCR |         | 2 <sup>nd</sup> PCR         |         | 3 <sup>rd</sup> PCR                     |         |
|---------------------|---------|-----------------------------|---------|-----------------------------------------|---------|
| Components          | Volume  | Components                  | Volume  | Components                              | Volume  |
| Genomic DNA         | 1.5 µL  | 1 <sup>st</sup> PCR product | 1.0 µl  | Dilution of 2 <sup>nd</sup> PCR product | 1.0 µl  |
| GSP1 (10 µM)        | 0.4 µl  | GSP2 (10 µM)                | 1.0 µl  | GSP3 (10 µM)                            | 1.0 µl  |
| FPn (10 µM)         | 2.0 µl  | FSP1 (10 µM)                | 1.0 µl  | FSP2 (10 µM)                            | 1.0 µl  |
| Premix PrimeSTAR HS | 12.5 µl | Premix PrimeSTAR HS         | 12.5 µl | Premix PrimeSTAR HS                     | 12.5 µl |
| ddH <sub>2</sub> O  | 8.6 µL  | ddH <sub>2</sub> O          | 9.5 µL  | ddH <sub>2</sub> O                      | 9.5 µL  |
| Total               | 25.0 µl | Total                       | 25.0 µl | Total                                   | 25.0 µl |

**Table S7.** Reaction procedures of FPNI-PCR

| Reactions           | Circles | Conditions temperature                                                                               |
|---------------------|---------|------------------------------------------------------------------------------------------------------|
| 1 <sup>st</sup> PCR | 1       | 95°C 90 s                                                                                            |
|                     | 2       | 94°C 10 s, 62°C 30 s, 72°C 2 min                                                                     |
|                     | 1       | 94°C 10 s, 25°C 2 min, 0.2°C/s, 72°C 2 min                                                           |
|                     | 6       | 94°C 10 s, 62°C 30 s, 72°C 2 min, 94°C 10 s, 62°C 30 s, 72°C 2 min, 94°C 10 s, 44°C 30 s, 72°C 2 min |
|                     | 1       | 72°C 5 min                                                                                           |
| 2 <sup>nd</sup> PCR | 1       | 95°C 90 s                                                                                            |
|                     | 30      | 94°C 10 s, 62°C 30 s, 72°C 2 min                                                                     |
|                     | 1       | 72°C 5 min                                                                                           |
| 3 <sup>rd</sup> PCR | 1       | 95°C 90 s                                                                                            |
|                     | 12      | 94°C 10 s, 62°C 30 s, 72°C 2 min                                                                     |
|                     | 1       | 72°C 5 min                                                                                           |

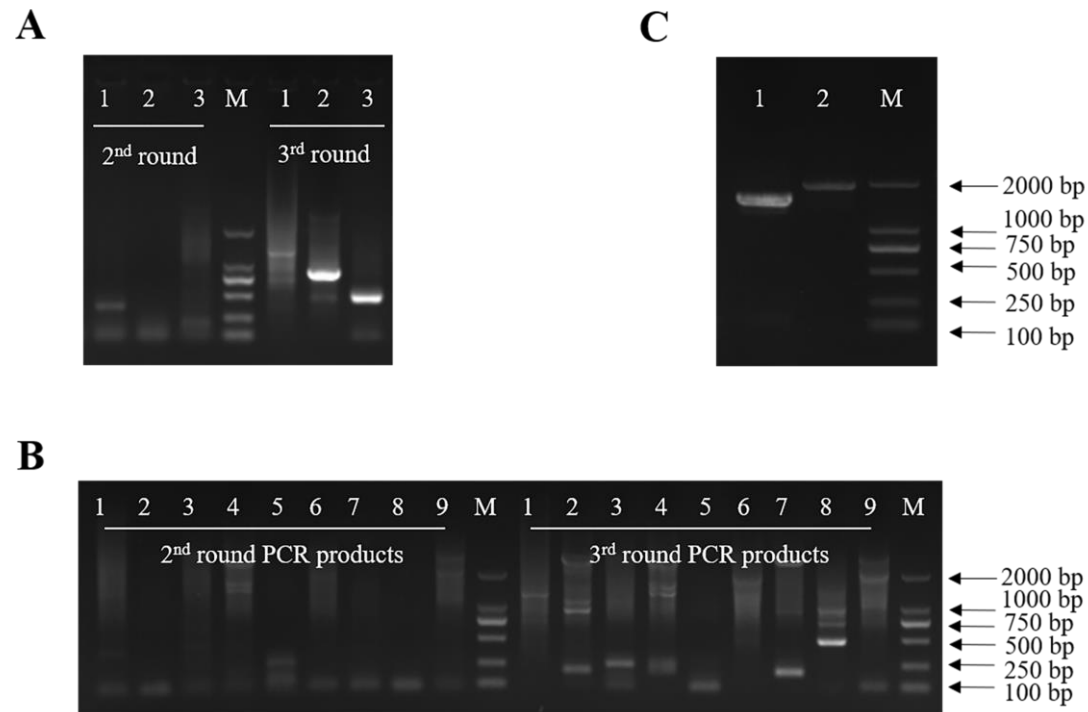

**Figure S1.** Cloning of the 5'-flanking sequences of *TwTPS27a* and *TwTPS27b*. (A) Identification of the 2<sup>nd</sup> round and 3<sup>rd</sup> round PCR products in the SiteFinding-PCR assays. The PCR reaction systems and procedures are shown in Table S4-S5. All primers used here are shown in Table S3. M: DL2000 Marker. (B) Identification of the 2<sup>nd</sup> round and 3<sup>rd</sup> round PCR products in the FPNI-PCR assays. The PCR reaction systems and procedures are shown in Table S6-S7. All primers used here are shown in Table S3. M: DL2000 Marker. (C) Identification of the PCR products of 5'-flanking sequence of target genes. 1, the PCR product of the 1496 bp-length 5'-flanking sequence using the specific primers of Pro-1-F and Pro-1-R. 2, the PCR product of the 1862 bp-length 5'-flanking sequence using the specific primers of Pro-2-F and Pro-2-R. All primers used here are shown in Table S3. M: DL2000 Marker.



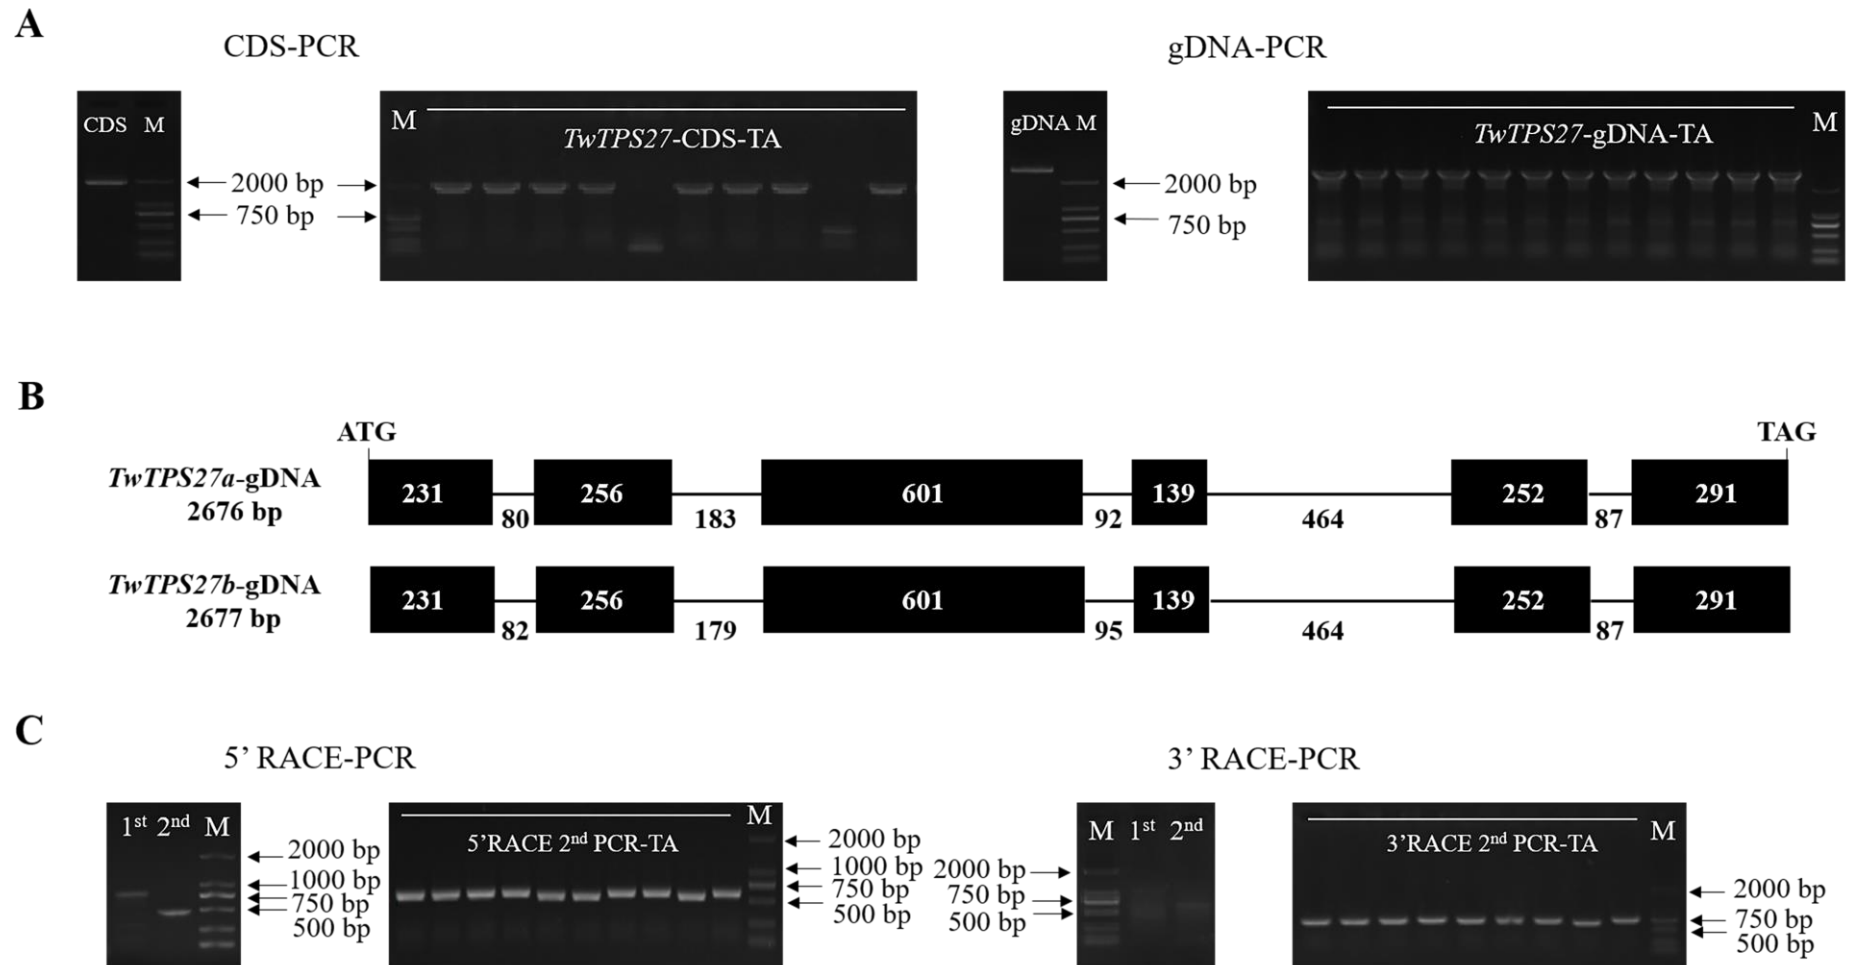

**Figure S2.** Identification of the PCR products for the full-length coding sequence (CDS), gDNA and 5'/3'-RACE of *TwTPS27a* and *TwTPS27b*. (A) Identification of the PCR product for full-length cDNA and gDNA of *TwTPS27*. Several positive clones of *TwTPS27*-cDNA-TA and *TwTPS27*-gDNA-TA were identified. M: DL2000 Marker. (B) Exon-intron structures of *TwTPS27a* and *TwTPS27b*. Exons and introns are represented by black boxes and straight lines, respectively. (C) Electrophoretogram analysis of 5'/3' RACE-PCR. 1<sup>st</sup> represents 1<sup>st</sup>-round 5'/3'RACE-PCR products, 2<sup>nd</sup> represents 2<sup>nd</sup>-round 5'/3'RACE-PCR products. M: DL2000 Marker. Several positive TA clones of 2<sup>nd</sup>-round PCR products (5'RACE 2<sup>nd</sup> PCR-TA and 3'RACE 2<sup>nd</sup> PCR-TA ) for 5'/3'RACE were identified.

**Nucleotide  
Identity  
=98.36%**

|          |                                                                                                                                                                                                           |      |
|----------|-----------------------------------------------------------------------------------------------------------------------------------------------------------------------------------------------------------|------|
| TwTPS27a | ATGGCACAATGTTCTCCCTCACCATCTCACACTTTGTTATACAGACTGGTTCAACAGCCCTTACACTACTCAGCTCTGCCTGAACCCAGAACAAAACATTTGTCATTCATCAAGACCAATTTGCATCGATCAACTCCAATTCGCTACAAATGAATCAACGGCCCTTGACTGACTACCGTCCGGGATCTGGAATCCGG     | 199  |
| TwTPS27b | ATGGCACAATGTTCTCCCTCACCATCTCACACTTTGTTATACAGACTGGTTCAACAGCCCTTACACTACTCAGCTCTGCCTGAACCCAGAACAAAACATTTGTCATTCATCAAGACCAATTTGCATCGATCAACTCCAATTCGCTACAAATGAATCAACGGCCCTTGACTGACTACCGTCCGGGATCTGGAATCCGG     | 199  |
| TwTPS27a | AGCTAATCGACTCCTTGACACTCCCTACAGTATCAATCACATGGAAACCAGCTGGAACAAGTTGAGCCAGATGCCAAGAGATTGCTTGGCTCCACTCTGATCTTGTCTCTCTTGAATCATGTTGATCGATGCAGCGATTAGGAATGCTTACCATTTTCAAGAAGAAATCGACTACTTGTCTAATACCTGATTT         | 399  |
| TwTPS27b | AGCTAATCGACTCCTTGACACTCCCTACAGTATCAATCACATGGAAACCAGCTGGAACAAGTTGAGCCAGATGCCAAGAGATTGCTTGGCTCCACTCTGATCTTGTCTCTCTTGAATCATGTTGATCGATGCAGCGATTAGGAATGCTTACCATTTTCAAGAAGAAATCGACTACTTGTCTAATACCTGATTT         | 399  |
| TwTPS27a | CAGCGTACTCTCCTGATGATCATGATCTCCACACAACTGCATTGAGGTTCCGCATCCTACGAGACAAACATTTCCCCATTAGCTCAGATGTGTTGAAAGTTTCATGAGCAGAGAAGGGAATTCCTGGACAGTTTGAGCAGAGATGTGAAAGGACTATTGAGTTTGTATGAAGCTTCATTCTTGGGAGTGGATGGAGA     | 599  |
| TwTPS27b | CAGCGTACTCTCCTGATGATCATGATCTCCACACAACTGCATTGAGGTTCCGCATCCTACGAGACAAACATTTCCCCATTAGCTCAGATGTGTTGAAAGTTTCATGAGCAGAGAAGGGAATTCCTGGACAGTTTGAGCAGAGATGTGAAAGGACTATTGAGTTTGTATGAAGCTTCATTCTTGGGAGTGGATGGAGA     | 599  |
| TwTPS27a | AGTTATTTTATGATGAAGCCAAAGAGTTCAAGTACAGAACTTAAGAGCCCTTACTGGGGAGATTGGAGATACGAGTATCGATCTGCGGAACAAGTCAACAGCTCTCAAAATTCCTGTTTTGGAGGATGCCAAGAGTGAAGCAAGGAATTTCAATGATTTCTACCAAGAAAGACCTGAAGAGCTCGACTTTGC          | 799  |
| TwTPS27b | AGTTATTTTATGATGAAGCCAAAGAGTTCAAGTACAGAACTTAAGAGCCCTTACTGGGGAGATTGGAGATACGAGTATCGATCTGCGGAACAAGTCAACAGCTCTCAAAATTCCTGTTTTGGAGGATGCCAAGAGTGAAGCAAGGAATTTCAATGATTTCTACCAAGAAAGACCTGAAGAGCTCGACTTTGC          | 799  |
| TwTPS27a | TTGAGCTGCCCAAGTTAGATTTCAATCTAGTCCAGCTCTACATATCTGCAGGAGCTGAAGAGCTATCAACTGGTGGGAAAACCTTGGGATTCAAAACAAGTAAAGCTTTACGAGGATCGATTGATCGAGAGCTACTTCTCGACGCAAGGATTACTTTCAAGCCCACTTTTCAAGCCAGAATAGCAGCAACAAG         | 999  |
| TwTPS27b | TTGAGCTGCCCAAGTTAGATTTCAATCTAGTCCAGCTCTACATATCTGCAGGAGCTGAAGAGCTATCAACTGGTGGGAAAACCTTGGGATTCAAAACAAGTAAAGCTTTACGAGGATCGATTGATCGAGAGCTACTTCTCGACGCAAGGATTACTTTCAAGCCCACTTTTCAAGCCAGAATAGCAGCAACAAG         | 999  |
| TwTPS27a | TTTATTAACATTGTTAATACCATTGATGACATACATGATTTATTTATGGATCACAAGATGATCTCAAACTCTTTCAGCGCTGTTAAGAGATGGGATTTGGCTGCCATGGAAGAAGCTCCGGATTACATGAAGATATGCTATTTTTCGGATGTACAATCTCGTTAACGAGCTGGCCTATGATGTTTTAATCAATCAAGGCAT | 1199 |
| TwTPS27b | TTTATTAACATTGTTAATACCATTGATGACATACATGATTTATTTATGGATCACAAGATGATCTCAAACTCTTTCAGCGCTGTTAAGAGATGGGATTTGGCTGCCATGGAAGAAGCTCCGGATTACATGAAGATATGCTATTTTTCGGATGTACAATCTCGTTAACGAGCTGGCCTATGATGTTTTAATCAATCAAGGCAT | 1199 |
| TwTPS27a | TGATGTTTTGCCCTGTCTTAGGGAAGCGTGGACAAGTTCTCGGGAGCAGCTTTTGTAGAATCTCAATGGTGTACACTGGGTATACACCAAGCATGGACGACTACCTGAAAATTTGTTGGATTTCAATAGTGTTCATGGAAGCTTAAACTTCGCTCGAGCCACCAGCAAGGATCAAGATCCCCCATGCTAATACAC       | 1399 |
| TwTPS27b | TGATGTTTTGCCCTGTCTTAGGGAAGCGTGGACAAGTTCTCGGGAGCAGCTTTTGTAGAATCTCAATGGTGTACACTGGGTATACACCAAGCATGGACGACTACCTGAAAATTTGTTGGATTTCAATAGTGTTCATGGAAGCTTAAACTTCGCTCGAGCCACCAGCAAGGATCAAGATCCCCCATGCTAATACAC       | 1399 |
| TwTPS27a | CACTCCACTGCTTGGAGATCGCTACTCTACTGGTCTCGCTCAITTTGCTGTTGAATAACGATTTGCAACTTTCACGATGAGAGCAAGCAGGGAGGTGGCAAGTTTTGTCAGTGTATATGGTTGAAAAGGTGATCGCAAGAGCAAGCATGTGATGAGATAAGGGAGTTGATAAAGCATGCATGGAAGATG             | 1599 |
| TwTPS27b | CACTCCACTGCTTGGAGATCGCTACTCTACTGGTCTCGCTCAITTTGCTGTTGAATAACGATTTGCAACTTTCACGATGAGAGCAAGCAGGGAGGTGGCAAGTTTTGTCAGTGTATATGGTTGAAAAGGTGATCGCAAGAGCAAGCATGTGATGAGATAAGGGAGTTGATAAAGCATGCATGGAAGATG             | 1599 |
| TwTPS27a | TTGAATACAGAGAGAAGGAGAAGTGAATCCACCATTAATGGTGAAGATGATGATGGACACCAAGCTTCCCAATGCCCTACACAGCAAGTGTGATGTTCCGGGTAGCCATCGAATTGACCAAGATGTCAATGCTCCTTGTATCTTTCCGCAATCTCTATTAG                                         | 1770 |
| TwTPS27b | TTGAATACAGAGAGAAGGAGAAGTGAATCCACCATTAATGGTGAAGATGATGATGGACACCAAGCTTCCCAATGCCCTACACAGCAAGTGTGATGTTCCGGGTAGCCATCGAATTGACCAAGATGTCAATGCTCCTTGTATCTTTCCGCAATCTCTATTAG                                         | 1770 |
| TwTPS27a | MAEYVWVSLTISHFVIQTGSTALHYSALPETRTRKHCHSSRPFASINSNSLQMNQRPLDYRPAIWNPELIDSLNTPYSYQSHGTQLDKLRQDAKRLLASTSDPCLLNHVESMQRLGIAYHFQEEIDVLLNTRIQPYSFDDHDLHTLALRFRILRDNNFISSEVFGKFSREGKFLDLSRDVKLLSLYEASFLGVDG       | 199  |
| TwTPS27b | MAEYVWVSLTISHFVIQTGSTALHYSALPETRTRKHCHSSRPFASINSNSLQMNQRPLDYRPAIWNPELIDSLNTPYSYQSHGTQLDKLRQDAKRLLASTSDPCLLNHVESMQRLGIAYHFQEEIDVLLNTRIQPYSFDDHDLHTLALRFRILRDNNFISSEVFGKFSREGKFLDLSRDVKLLSLYEASFLGVDG       | 199  |
| TwTPS27a | EVILDEAREFSSKNLRALLGRLESTSIDVAEQVQSLQIPLFWRMFRVEARNFIDFYQKRDVKSSTLLELAKLDFNLVQSTYQGELELSRWENLGFQKLSFRDRMLQSYFSTHGITFRPQFSKARIAATRFINIVNTIDDIHDYYSQDDLLKLSAVKRWDLAAMEELPDYMKICYFAMYNLVNELAYDVLINQG         | 399  |
| TwTPS27b | EVILDEAREFSSKNLRALLGRLESTSIDVAEQVQSLQIPLFWRMFRVEARNFIDFYQKRDVKSSTLLELAKLDFNLVQSTYQGELELSRWENLGFQKLSFRDRMLQSYFSTHGITFRPQFSKARIAATRFINIVNTIDDIHDYYSQDDLLKLSAVKRWDLAAMEELPDYMKICYFAMYNLVNELAYDVLINQG         | 399  |
| TwTPS27a | IDVLPCLRREAWTKFCGAAFVESQWCYTGTPSMDDYLKNCWISIGVHGSINLFARAHQCGSRSPNANTPLHCLELFLYSSVICRLNNDLATFCHESKTGEVSEVRCVMVEKGVSGECACDEIRELIKHWKMLNTERRSIDLPLMVMCMCDTPKLSQCLYCHGDDGFVAIDLTKDVMSSLIFRCHSI                | 589  |
| TwTPS27b | IDVLPCLRREAWTKFCGAAFVESQWCYTGTPSMDDYLKNCWISIGVHGSINLFARAHQCGSRSPNANTPLHCLELFLYSSVICRLNNDLATFCHESKTGEVSEVRCVMVEKGVSGECACDEIRELIKHWKMLNTERRSIDLPLMVMCMCDTPKLSQCLYCHGDDGFVAIDLTKDVMSSLIFRCHSI                | 589  |

Figure S3. The full-length CDSs and protein sequences alignment between *TwTPS27a* and *TwTPS27b*.

|          |                                                                                                                                                                                                       |                                                                                                                                                                                                       |      |
|----------|-------------------------------------------------------------------------------------------------------------------------------------------------------------------------------------------------------|-------------------------------------------------------------------------------------------------------------------------------------------------------------------------------------------------------|------|
| TwIPS27a | ATGGCACC                                                                                                                                                                                              | ATGGCACC                                                                                                                                                                                              | 200  |
| gDNA-27a | ATGGCACC                                                                                                                                                                                              | ATGGCACC                                                                                                                                                                                              | 200  |
| TwIPS27a | GCTAATCGACTCCTTGAACACTCCCTACAGC                                                                                                                                                                       | GCTAATCGACTCCTTGAACACTCCCTACAGC                                                                                                                                                                       | 320  |
| gDNA-27a | GCTAATCGACTCCTTGAACACTCCCTACAGC                                                                                                                                                                       | GCTAATCGACTCCTTGAACACTCCCTACAGC                                                                                                                                                                       | 400  |
| TwIPS27a | TCATGTTGAGTCGATGCAGCGATTAGGAATCGCTTACCAATTTTCAAGAAGAAATCGACTACTGCTTAATACTCGTATTACAGCCGACTCTCCTGATCATGATCTCCACACACTGCATTGAGGTTCCGCATCCTACGAGACAAATTTCCCATAGCTCAG                                       | TCATGTTGAGTCGATGCAGCGATTAGGAATCGCTTACCAATTTTCAAGAAGAAATCGACTACTGCTTAATACTCGTATTACAGCCGACTCTCCTGATCATGATCTCCACACACTGCATTGAGGTTCCGCATCCTACGAGACAAATTTCCCATAGCTCAG                                       | 487  |
| gDNA-27a | TCATGTTGAGTCGATGCAGCGATTAGGAATCGCTTACCAATTTTCAAGAAGAAATCGACTACTGCTTAATACTCGTATTACAGCCGACTCTCCTGATCATGATCTCCACACACTGCATTGAGGTTCCGCATCCTACGAGACAAATTTCCCATAGCTCAG                                       | TCATGTTGAGTCGATGCAGCGATTAGGAATCGCTTACCAATTTTCAAGAAGAAATCGACTACTGCTTAATACTCGTATTACAGCCGACTCTCCTGATCATGATCTCCACACACTGCATTGAGGTTCCGCATCCTACGAGACAAATTTCCCATAGCTCAG                                       | 600  |
| TwIPS27a | .....ATGTTGGAAAGTTTCATGAGCAGAGAAGGAAATTCCTGGACGTTTG                                                                                                                                                   | .....ATGTTGGAAAGTTTCATGAGCAGAGAAGGAAATTCCTGGACGTTTG                                                                                                                                                   | 537  |
| gDNA-27a | TCITTTTATTTTTTTTTATTTTATAGATCAGATATATTTAAAGAGACTTTATGCAAGCCTAAGCAAGAAATGCCAAGGAGCCCAAGGCAACANTTTGCTTGTAAATTACTGATTAACTTACTATACAAATTAAGCAGATGTTGGAAAGTTTCATGAGCAGAGAAGGAAATTCCTGGACGTTTG               | TCITTTTATTTTTTTTTATTTTATAGATCAGATATATTTAAAGAGACTTTATGCAAGCCTAAGCAAGAAATGCCAAGGAGCCCAAGGCAACANTTTGCTTGTAAATTACTGATTAACTTACTATACAAATTAAGCAGATGTTGGAAAGTTTCATGAGCAGAGAAGGAAATTCCTGGACGTTTG               | 800  |
| TwIPS27a | AGCAGAGATGTAAGGACTATTGAGTTTGTATGAAGCTTCATTCTGGGAGTGGATGGAGAAGTTATTTAGATGAAGCCAAAGATTCAAGTACGAAAGCTTAAAGCCTTACTGGGAGATTGGAGAGTACGATATCGATGTTGCGGAACAAGTGAAGCAGTCGCTACAAATTCCTCTGTTTGGAGGATGCCAAG       | AGCAGAGATGTAAGGACTATTGAGTTTGTATGAAGCTTCATTCTGGGAGTGGATGGAGAAGTTATTTAGATGAAGCCAAAGATTCAAGTACGAAAGCTTAAAGCCTTACTGGGAGATTGGAGAGTACGATATCGATGTTGCGGAACAAGTGAAGCAGTCGCTACAAATTCCTCTGTTTGGAGGATGCCAAG       | 737  |
| gDNA-27a | AGCAGAGATGTAAGGACTATTGAGTTTGTATGAAGCTTCATTCTGGGAGTGGATGGAGAAGTTATTTAGATGAAGCCAAAGATTCAAGTACGAAAGCTTAAAGCCTTACTGGGAGATTGGAGAGTACGATATCGATGTTGCGGAACAAGTGAAGCAGTCGCTACAAATTCCTCTGTTTGGAGGATGCCAAG       | AGCAGAGATGTAAGGACTATTGAGTTTGTATGAAGCTTCATTCTGGGAGTGGATGGAGAAGTTATTTAGATGAAGCCAAAGATTCAAGTACGAAAGCTTAAAGCCTTACTGGGAGATTGGAGAGTACGATATCGATGTTGCGGAACAAGTGAAGCAGTCGCTACAAATTCCTCTGTTTGGAGGATGCCAAG       | 1000 |
| TwIPS27a | AGTGGAAAGCAAGGAAATTCATTGATTTTACCAAAGAAAGACGTGAAGAGCTCGACTTTGCTTGAGCTTGCACAGTTAGATTTCAATCTAGTCCAGCTACATATCAACAGGAGCTGAAGAGCTTCAAAAGTGGTGGGAAACTTGGGATTCAAAACAAAGTTAAGCTTTACGAGGATCGATTGATCGAGAGCTACT   | AGTGGAAAGCAAGGAAATTCATTGATTTTACCAAAGAAAGACGTGAAGAGCTCGACTTTGCTTGAGCTTGCACAGTTAGATTTCAATCTAGTCCAGCTACATATCAACAGGAGCTGAAGAGCTTCAAAAGTGGTGGGAAACTTGGGATTCAAAACAAAGTTAAGCTTTACGAGGATCGATTGATCGAGAGCTACT   | 937  |
| gDNA-27a | AGTGGAAAGCAAGGAAATTCATTGATTTTACCAAAGAAAGACGTGAAGAGCTCGACTTTGCTTGAGCTTGCACAGTTAGATTTCAATCTAGTCCAGCTACATATCAACAGGAGCTGAAGAGCTTCAAAAGTGGTGGGAAACTTGGGATTCAAAACAAAGTTAAGCTTTACGAGGATCGATTGATCGAGAGCTACT   | AGTGGAAAGCAAGGAAATTCATTGATTTTACCAAAGAAAGACGTGAAGAGCTCGACTTTGCTTGAGCTTGCACAGTTAGATTTCAATCTAGTCCAGCTACATATCAACAGGAGCTGAAGAGCTTCAAAAGTGGTGGGAAACTTGGGATTCAAAACAAAGTTAAGCTTTACGAGGATCGATTGATCGAGAGCTACT   | 1200 |
| TwIPS27a | ICTCGACGACAGGATTACTTTCAAGCCCCAGTTTTCCAAAGCCAGAATAGCAGCAACAAGTTTATTAACATTTGTAATACCATTGATGACATACATGATTATTTGGATCACAAGATGATCTCAAACCTTTTGATAGCGCTGTTAAGAG                                                  | ICTCGACGACAGGATTACTTTCAAGCCCCAGTTTTCCAAAGCCAGAATAGCAGCAACAAGTTTATTAACATTTGTAATACCATTGATGACATACATGATTATTTGGATCACAAGATGATCTCAAACCTTTTGATAGCGCTGTTAAGAG                                                  | 1088 |
| gDNA-27a | ICTCGACGACAGGATTACTTTCAAGCCCCAGTTTTCCAAAGCCAGAATAGCAGCAACAAGTTTATTAACATTTGTAATACCATTGATGACATACATGATTATTTGGATCACAAGATGATCTCAAACCTTTTGATAGCGCTGTTAAGAG                                                  | ICTCGACGACAGGATTACTTTCAAGCCCCAGTTTTCCAAAGCCAGAATAGCAGCAACAAGTTTATTAACATTTGTAATACCATTGATGACATACATGATTATTTGGATCACAAGATGATCTCAAACCTTTTGATAGCGCTGTTAAGAG                                                  | 1400 |
| TwIPS27a | .....ATGGGATTGGCTGCCATGGAAAGACTTCCGGATTACATGAAGATATGCTATTTTGGCATGTACAATCTCGTTAACGAGCTGGCCTATGATGTTTTAATCAATCAAGGCATTGATGTTTTGCCCTGTCTTAGGGAAGCC                                                       | .....ATGGGATTGGCTGCCATGGAAAGACTTCCGGATTACATGAAGATATGCTATTTTGGCATGTACAATCTCGTTAACGAGCTGGCCTATGATGTTTTAATCAATCAAGGCATTGATGTTTTGCCCTGTCTTAGGGAAGCC                                                       | 1227 |
| gDNA-27a | AGTGTATGATCGAAGCTTTCCITTTTTGATTGAATTTGCAGATGGGATTGGCTGCCATGGAAAGACTTCCGGATTACATGAAGATATGCTATTTTGGCATGTACAATCTCGTTAACGAGCTGGCCTATGATGTTTTAATCAATCAAGGCATTGATGTTTTGCCCTGTCTTAGGGAAGCC                   | AGTGTATGATCGAAGCTTTCCITTTTTGATTGAATTTGCAGATGGGATTGGCTGCCATGGAAAGACTTCCGGATTACATGAAGATATGCTATTTTGGCATGTACAATCTCGTTAACGAGCTGGCCTATGATGTTTTAATCAATCAAGGCATTGATGTTTTGCCCTGTCTTAGGGAAGCC                   | 1600 |
| TwIPS27a | .....                                                                                                                                                                                                 | .....                                                                                                                                                                                                 | 1227 |
| gDNA-27a | ATCATGTTAATATATACTTGATGGTGTGTTTACCATTGTGTTTGCACCTTCAAACCTCTCAAATGCACTGCTTTTGGTGTAACTACCCGCACTGCGATGAGTTGCAAGCTGAGGCTGATAGGAGCTGCTCCCACTCCAAACGTAATGCTATTGACCGCATTTTCGATATTAACACAGAGATTTTTCCCAATTTTGT  | ATCATGTTAATATATACTTGATGGTGTGTTTACCATTGTGTTTGCACCTTCAAACCTCTCAAATGCACTGCTTTTGGTGTAACTACCCGCACTGCGATGAGTTGCAAGCTGAGGCTGATAGGAGCTGCTCCCACTCCAAACGTAATGCTATTGACCGCATTTTCGATATTAACACAGAGATTTTTCCCAATTTTGT  | 1800 |
| TwIPS27a | .....                                                                                                                                                                                                 | .....                                                                                                                                                                                                 | 1227 |
| gDNA-27a | TCTCAATCAATTTTATTTTAAATATATTTCTTACGAAATAAATGATTTGAATGAAGATATCTAATTTTATCCTCATTGACAAAGTATTCTTAGTGACGTGTCAAAAACACTTTTGTACCGCAATTCACCTCACTAGAGTTTCAAACTCGCTGACCTCAATATAGGAGTCAAAACACAACCTTTGTCCCA         | TCTCAATCAATTTTATTTTAAATATATTTCTTACGAAATAAATGATTTGAATGAAGATATCTAATTTTATCCTCATTGACAAAGTATTCTTAGTGACGTGTCAAAAACACTTTTGTACCGCAATTCACCTCACTAGAGTTTCAAACTCGCTGACCTCAATATAGGAGTCAAAACACAACCTTTGTCCCA         | 2000 |
| TwIPS27a | .....TGGACAAGTTCTCGGAGCAGCTTTTGTAGAATCTCAATGGTGTACTACTGGGTATACCAAGCATGGACGACTACCTGAAAAATTTGTTGGATTCAATAGGTGTTTCATGGAAGCTTAAACTTCGCTCGAGCGCACCAGCAAGGATCAAGAT                                          | .....TGGACAAGTTCTCGGAGCAGCTTTTGTAGAATCTCAATGGTGTACTACTGGGTATACCAAGCATGGACGACTACCTGAAAAATTTGTTGGATTCAATAGGTGTTTCATGGAAGCTTAAACTTCGCTCGAGCGCACCAGCAAGGATCAAGAT                                          | 1381 |
| gDNA-27a | AACAGTCTATGTTAAACTATTGGTAACCAAGACCTTGTGGATGCAGTGGACAAGTTCTCGGAGCAGCTTTTGTAGAATCTCAATGGTGTACTACTGGGTATACCAAGCATGGACGACTACCTGAAAAATTTGTTGGATTCAATAGGTGTTTCATGGAAGCTTAAACTTCGCTCGAGCGCACCAGCAAGGATCAAGAT | AACAGTCTATGTTAAACTATTGGTAACCAAGACCTTGTGGATGCAGTGGACAAGTTCTCGGAGCAGCTTTTGTAGAATCTCAATGGTGTACTACTGGGTATACCAAGCATGGACGACTACCTGAAAAATTTGTTGGATTCAATAGGTGTTTCATGGAAGCTTAAACTTCGCTCGAGCGCACCAGCAAGGATCAAGAT | 2200 |
| TwIPS27a | CCCCATAGCTAATACACCCTCCACTGCTTGAAGATCCGCTACTCTACTGGTCTGCTCGCTCATTGTGCGTTTGAATAACGATTGGCAACTTTCCAG                                                                                                      | CCCCATAGCTAATACACCCTCCACTGCTTGAAGATCCGCTACTCTACTGGTCTGCTCGCTCATTGTGCGTTTGAATAACGATTGGCAACTTTCCAG                                                                                                      | 1494 |
| gDNA-27a | CCCCATAGCTAATACACCCTCCACTGCTTGAAGATCCGCTACTCTACTGGTCTGCTCGCTCATTGTGCGTTTGAATAACGATTGGCAACTTTCCAG                                                                                                      | CCCCATAGCTAATACACCCTCCACTGCTTGAAGATCCGCTACTCTACTGGTCTGCTCGCTCATTGTGCGTTTGAATAACGATTGGCAACTTTCCAG                                                                                                      | 2400 |
| TwIPS27a | GGGAGTGGTAACTTTTTCAGTGTATATGGTTGAAAAGGTGTATCGCAAGAGCAAGCATGTGATGAGATAAGGGAGTTGATAAAGCATGCATGGAAGATGTTGAATACAGAGAGGAGGAAAGTATCTCCACCATTAAATGGTGGAAATGTGTATGGACACCAAAAGCTTTCCCAATGCCCTTACCAGCATGG       | GGGAGTGGTAACTTTTTCAGTGTATATGGTTGAAAAGGTGTATCGCAAGAGCAAGCATGTGATGAGATAAGGGAGTTGATAAAGCATGCATGGAAGATGTTGAATACAGAGAGGAGGAAAGTATCTCCACCATTAAATGGTGGAAATGTGTATGGACACCAAAAGCTTTCCCAATGCCCTTACCAGCATGG       | 1694 |
| gDNA-27a | GGGAGTGGTAACTTTTTCAGTGTATATGGTTGAAAAGGTGTATCGCAAGAGCAAGCATGTGATGAGATAAGGGAGTTGATAAAGCATGCATGGAAGATGTTGAATACAGAGAGGAGGAAAGTATCTCCACCATTAAATGGTGGAAATGTGTATGGACACCAAAAGCTTTCCCAATGCCCTTACCAGCATGG       | GGGAGTGGTAACTTTTTCAGTGTATATGGTTGAAAAGGTGTATCGCAAGAGCAAGCATGTGATGAGATAAGGGAGTTGATAAAGCATGCATGGAAGATGTTGAATACAGAGAGGAGGAAAGTATCTCCACCATTAAATGGTGGAAATGTGTATGGACACCAAAAGCTTTCCCAATGCCCTTACCAGCATGG       | 2600 |
| TwIPS27a | TGATGGTTTCGGGGTAGCCATCGATTGACCAAAAGATGTCATGTCCCTTGATCTTTGCCCCAATCCCTATTTA                                                                                                                             | TGATGGTTTCGGGGTAGCCATCGATTGACCAAAAGATGTCATGTCCCTTGATCTTTGCCCCAATCCCTATTTA                                                                                                                             | 1769 |
| gDNA-27a | TGATGGTTTCGGGGTAGCCATCGATTGACCAAAAGATGTCATGTCCCTTGATCTTTGCCCCAATCCCTATTTA                                                                                                                             | TGATGGTTTCGGGGTAGCCATCGATTGACCAAAAGATGTCATGTCCCTTGATCTTTGCCCCAATCCCTATTTA                                                                                                                             | 2675 |

Figure S4. Sequence alignment between the full-length CDS and gDNA of *TwIPS27a*.

|          |                                                                                                                                                                                                                       |      |
|----------|-----------------------------------------------------------------------------------------------------------------------------------------------------------------------------------------------------------------------|------|
| TwTPS27b | ATGGCACC                                                                                                                                                                                                              | 200  |
| gDNA-27b | ATGGCACC                                                                                                                                                                                                              | 200  |
| TwTPS27b | GCTAATCGACTCCCTTGAACACTCCCTACAGT                                                                                                                                                                                      | 318  |
| gDNA-27b | GCTAATCGACTCCCTTGAACACTCCCTACAGT                                                                                                                                                                                      | 400  |
| TwTPS27b | AATCATGTTGAGTCGATGCGAGGATTAGGAATTCCTACCAATTTCAAGAGAAATCGACTACTTGCCTAATCTGCTATTCAAGCCGCTACTCTGATGATCATGATCTCCACRCACTGCTTGGAGTCCGCTACTACGAGACAACATTTCCCATTAGCTCAG                                                       | 487  |
| gDNA-27b | AATCATGTTGAGTCGATGCGAGGATTAGGAATTCCTACCAATTTCAAGAGAAATCGACTACTTGCCTAATCTGCTATTCAAGCCGCTACTCTGATGATCATGATCTCCACRCACTGCTTGGAGTCCGCTACTACGAGACAACATTTCCCATTAGCTCAG                                                       | 600  |
| TwTPS27b | ATGTGTTTGGAAAGTTCATGAGCAGAGAAGGAAATTCCTGGACAGTTTGAG                                                                                                                                                                   | 539  |
| gDNA-27b | ATGTGTTTGGAAAGTTCATGAGCAGAGAAGGAAATTCCTGGACAGTTTGAG                                                                                                                                                                   | 800  |
| TwTPS27b | CAGAGATGTAAGGACTATTGAGTTTGTATGAAGCTTCACTTGGGAGTGGATGGAGAAGTTATTTAGATGAAGCCAAAGAGTTCAGTAGCAAGAACTTAAGAGCCCTTACTGGGGAGATTGGAGAGTACGAGTATCGATGTCGCGGAACAAGTAAAGCAGTCACTGCAAAATCCCTGTTTTGGAGGATGCCAAGAG                   | 739  |
| gDNA-27b | CAGAGATGTAAGGACTATTGAGTTTGTATGAAGCTTCACTTGGGAGTGGATGGAGAAGTTATTTAGATGAAGCCAAAGAGTTCAGTAGCAAGAACTTAAGAGCCCTTACTGGGGAGATTGGAGAGTACGAGTATCGATGTCGCGGAACAAGTAAAGCAGTCACTGCAAAATCCCTGTTTTGGAGGATGCCAAGAG                   | 1000 |
| TwTPS27b | TGGAAGCAAGGAATTCATTGATTTCTACCAGAAGAAGACGCGAAGAGCTCGACTTTCCTTGGAGTGGATGGAGAAGTTATTTAGATGAAGCCAAAGAGTTCAGTAGCAAGAACTTAAGAGCCCTTACTGGGGAGATTGGAGAGTACGAGTATCGATGTCGCGGAACAAGTAAAGCAGTCACTGCAAAATCCCTGTTTTGGAGGATGCCAAGAG | 939  |
| gDNA-27b | TGGAAGCAAGGAATTCATTGATTTCTACCAGAAGAAGACGCGAAGAGCTCGACTTTCCTTGGAGTGGATGGAGAAGTTATTTAGATGAAGCCAAAGAGTTCAGTAGCAAGAACTTAAGAGCCCTTACTGGGGAGATTGGAGAGTACGAGTATCGATGTCGCGGAACAAGTAAAGCAGTCACTGCAAAATCCCTGTTTTGGAGGATGCCAAGAG | 1200 |
| TwTPS27b | TCGACGATAGGGATTACTTTCAAGCCCAAGTATTAACCAATGTTAATACCAATGATGACATACATGATTTATGATCAACAGATGATCTCAAACTCTTTAACAGCCGCTGTTAAGAG                                                                                                  | 1088 |
| gDNA-27b | TCGACGATAGGGATTACTTTCAAGCCCAAGTATTAACCAATGTTAATACCAATGATGACATACATGATTTATGATCAACAGATGATCTCAAACTCTTTAACAGCCGCTGTTAAGAG                                                                                                  | 1400 |
| TwTPS27b | ATGGGATTGGCTGCCATGGAAGAACTTCCGGATTACATGAAGATATGCTATTTTGGCATGACAACTCCTTAAACGAGCTGGCCTATGATGTTTTAATCAATCAGGGCATTGATGTTTTGCCCTGCTTAGGGAAGCG                                                                              | 1227 |
| gDNA-27b | ATGGGATTGGCTGCCATGGAAGAACTTCCGGATTACATGAAGATATGCTATTTTGGCATGACAACTCCTTAAACGAGCTGGCCTATGATGTTTTAATCAATCAGGGCATTGATGTTTTGCCCTGCTTAGGGAAGCG                                                                              | 1600 |
| TwTPS27b | CATTATGTTAATATATACTGATGGTGGCTTTGACCGTGTGTTTGGCCCTTCAACCGCTCAAAGACATGCTTTTGGTGTGAAGTATGCTATTTTGGCATGACAACTCCTTAAACGAGCTGGCCTATGATGTTTTAATCAATCAGGGCATTGATGTTTTGCCCTGCTTAGGGAAGCG                                       | 1227 |
| gDNA-27b | CATTATGTTAATATATACTGATGGTGGCTTTGACCGTGTGTTTGGCCCTTCAACCGCTCAAAGACATGCTTTTGGTGTGAAGTATGCTATTTTGGCATGACAACTCCTTAAACGAGCTGGCCTATGATGTTTTAATCAATCAGGGCATTGATGTTTTGCCCTGCTTAGGGAAGCG                                       | 1800 |
| TwTPS27b | ATCCTCAATAAATTTTATTTTAAATATATTTTACGAAAAAATGATTTGAATGAAAAATATCTAATTTTACCCTCATTGACAAAGTATTTAGTAACTGTCAAAACACTTTTATCACCACACTCACCTCCTAGAGTTTCAAACTCGCTTGACCTCCTACAGGAGGTCAAAACACACTTGCTCCC                                | 1227 |
| gDNA-27b | ATCCTCAATAAATTTTATTTTAAATATATTTTACGAAAAAATGATTTGAATGAAAAATATCTAATTTTACCCTCATTGACAAAGTATTTAGTAACTGTCAAAACACTTTTATCACCACACTCACCTCCTAGAGTTTCAAACTCGCTTGACCTCCTACAGGAGGTCAAAACACACTTGCTCCC                                | 2000 |
| TwTPS27b | TGGACAAAGTTCGCGGAGCAGCTTTGTAGAATCTCAATGGTGTACACTGGGTATACACCAAGCATGGAGACTACCTGAAAAATTTGTTGATTTCAATAGGTGTTCAIGGAAGCTTAAACTTCGCTCGAGCGCACCCAGGATCAAGA                                                                    | 1380 |
| gDNA-27b | TGGACAAAGTTCGCGGAGCAGCTTTGTAGAATCTCAATGGTGTACACTGGGTATACACCAAGCATGGAGACTACCTGAAAAATTTGTTGATTTCAATAGGTGTTCAIGGAAGCTTAAACTTCGCTCGAGCGCACCCAGGATCAAGA                                                                    | 2200 |
| TwTPS27b | TCGCCATGGCTAATACCACTCCACTGCTTGGAAAGTACAGTACTACTGGTTCGCTGCTCATTGTCGTTTGAATAACGATTTGGCAACTTTCAG                                                                                                                         | 1493 |
| gDNA-27b | TCGCCATGGCTAATACCACTCCACTGCTTGGAAAGTACAGTACTACTGGTTCGCTGCTCATTGTCGTTTGAATAACGATTTGGCAACTTTCAG                                                                                                                         | 2400 |
| TwTPS27b | AGGGAGGTGGCAAGTTTGTCAACTGTTATATGTTGAAAAAGTGTATCGCAAGACAAACATGATGATGATGATAGGGAGTTGATAAAGCATGATGGAAGTGTGTAATACGAGAGAGGAGAGTGTATCCACCATTAAATGCTGGAATGTGTTGGACACACCAAGCTTTCCCAATGCCTTACCAGCAGC                            | 1693 |
| gDNA-27b | AGGGAGGTGGCAAGTTTGTCAACTGTTATATGTTGAAAAAGTGTATCGCAAGACAAACATGATGATGATGATAGGGAGTTGATAAAGCATGATGGAAGTGTGTAATACGAGAGAGGAGAGTGTATCCACCATTAAATGCTGGAATGTGTTGGACACACCAAGCTTTCCCAATGCCTTACCAGCAGC                            | 2600 |
| TwTPS27b | GTGATGGATTGGGGTAGCCATCGAGTTGACCAAGATGTCATGTCCTCCTTGTATCTTTCGCCAATCTCTATTTA                                                                                                                                            | 1769 |
| gDNA-27b | GTGATGGATTGGGGTAGCCATCGAGTTGACCAAGATGTCATGTCCTCCTTGTATCTTTCGCCAATCTCTATTTA                                                                                                                                            | 2676 |

Figure S5. Sequence alignment between the CDS and gDNA of *TwTPS27b*.

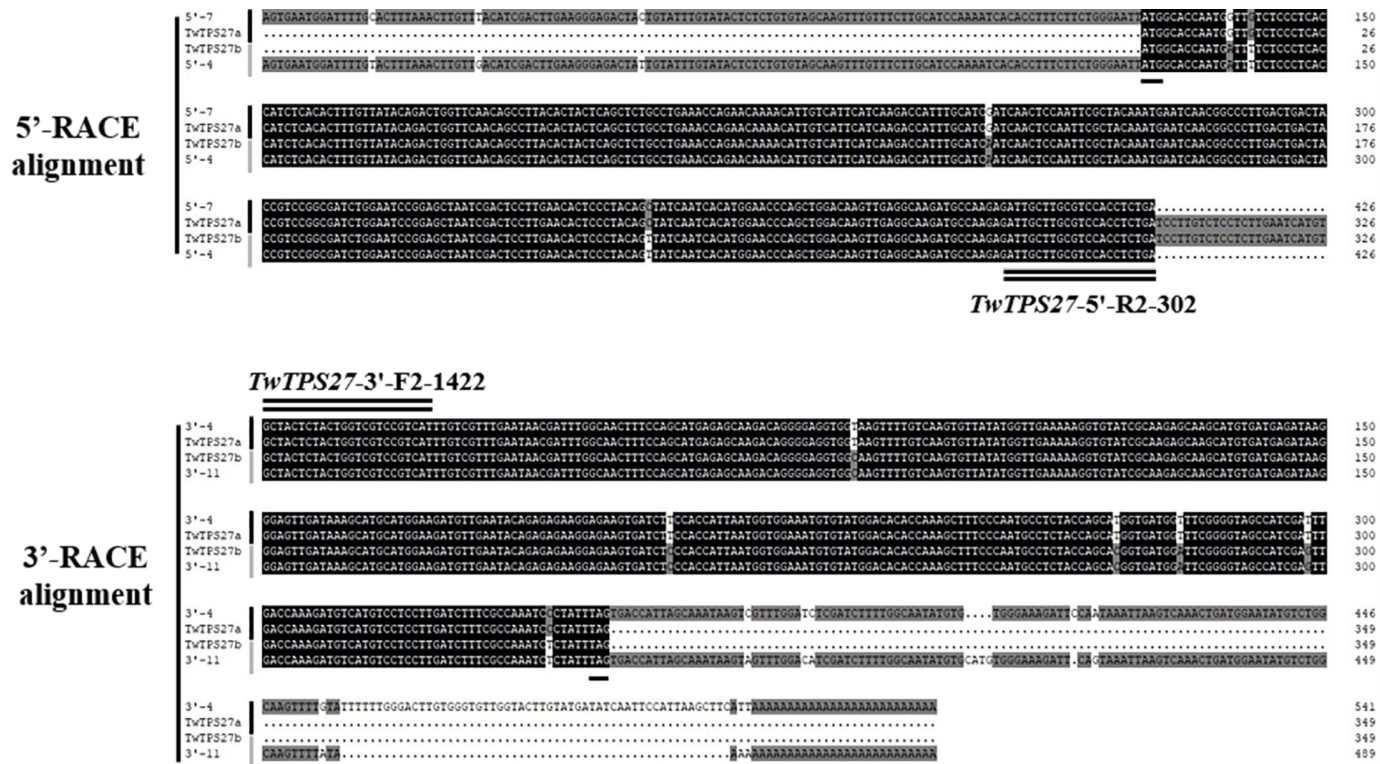

**Figure S6.** Sequence alignment between 5'/3'-RACE sequences and CDSs of *TwTPS27ab*. The primers used for 2<sup>nd</sup> round 5'/3'-RACE PCR are marked with two straight lines. The start codon (ATG) and stop codon (TAG) are marked with a single line.

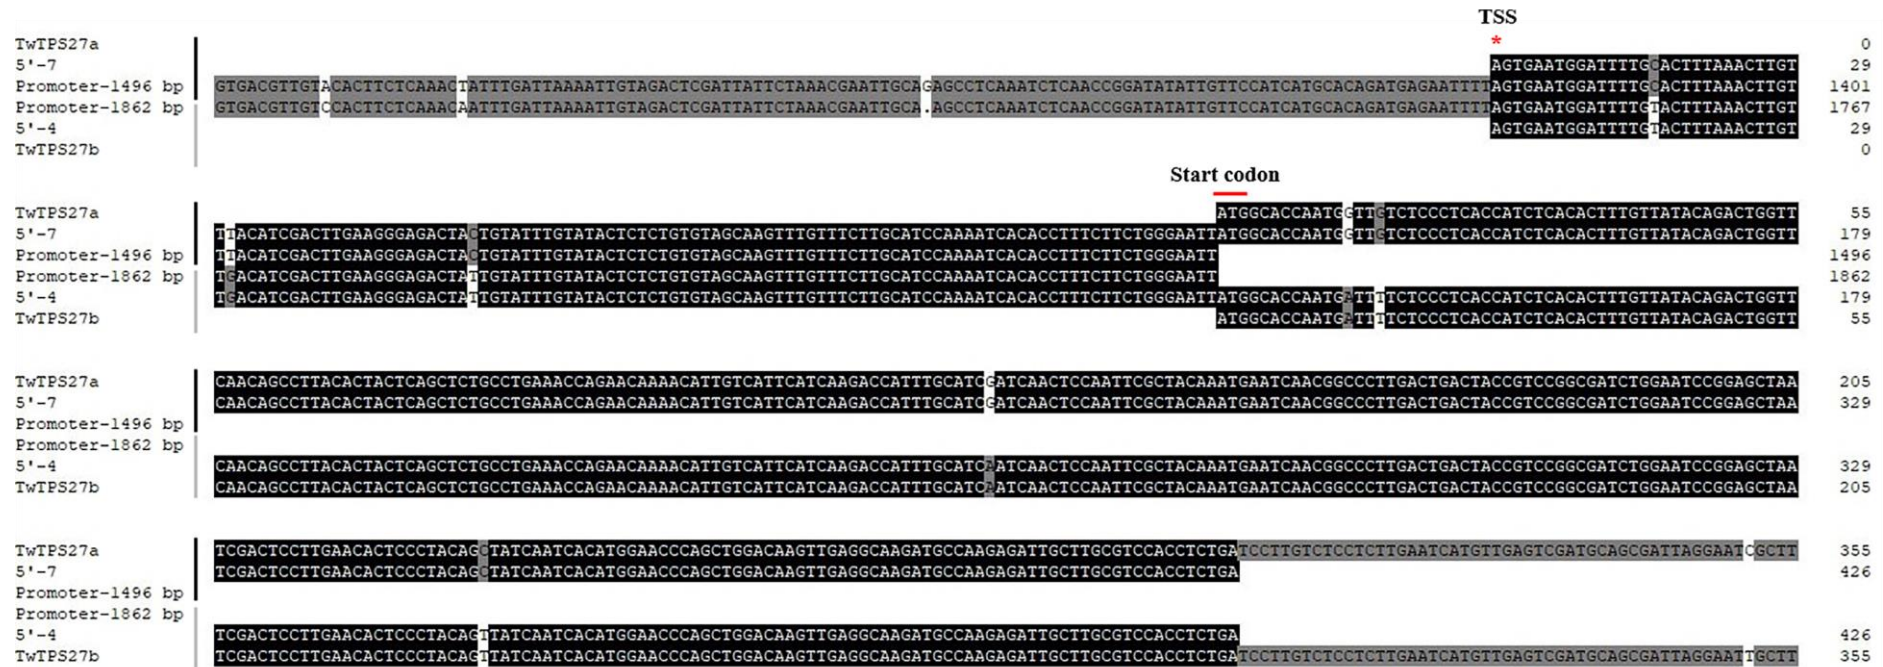

**Figure S7.** Sequence alignment for the determination of the *TwIPS27a* and *TwIPS27b* promoters. The 5'-7 and 5'-4 represent the 5'-RACE sequences of *TwIPS27a* and *TwIPS27b* from 5'-RACE assays, respectively. The TwIPS27a and TwIPS27b represent the coding sequences of *TwIPS27a* and *TwIPS27b*, respectively. The red asterisk represents the transcription start site (TSS). The start codons (ATGs) of *TwIPS27a/b* are marked with a red sigle line. After sequences alignment, the 1496 bp promoter sequence belongs to the *TwIPS27a* gene, whereas the 1862 bp promoter sequence belongs to the *TwIPS27b* gene.

27aPro-1239bp TAAACATAAGTCTGCTGAAATTTATTTGGAAAAAATTTTGTATATGAAACATCTCTTAAAGGTACACTTTCTATCATCTTCTACCTCAAGCCCTCTCTTTTAAACTAACATCTCTCTCTCTCTACCTCACGCTCTCTCCCT  
 27bPro-1212bp TAAACATAAGTCTGCTGAAATTTATTTGGAAAAAATTTTGTATATGAAACATCTCTTAAAGGTACACTTTCTATCATCTTCTACCTCAAGCCCTCTCTTTTAAACTAACATCTCTCTCTCTCTACCTCACATCTCTTCCCT

27aPro-1239bp CTTCTATATTAGATTCTCACCTTCTCTCTAAGATTTCGACCTCTCTTCAATCTTCTTTTATGTACATGGGCAAGCTTAAACGGGATCCGGAGGCAAATTTTATAGGGTTATCTATTAATTATATTATTGAAAGTATAAAAAA  
 27bPro-1212bp CTTCTATATTAGATTCTC.....TCTCTTCAATCTTCTTTTATGTACATGGGCAAGCTTAAACGGGATCCGGAGGCAAATTTTATAGGGTTATCTATTAATTATATTATTGAAAGTATAAAAAA.

27aPro-1239bp ATATTAAATCAAATTTTATAAAATATGATAAGTAATAATTGTCACATGTCATCTTGGTTTAAATCATGATTTTTCATATGATGGACGTTTAAATGAATATTGAGGAGGCTTTTATATAAATTATCTATATATAAGGTTATTAAAA  
 27bPro-1212bp TACTTAAATCAAATTTTATAAAATATGATAAGTAATAATTGTCACATGTTTCTTGGTTTAAATCATGATTTTTCATATGATGGACGTTTAAATGAATATTGAGGAGGCTTTTATATAAATTATCTATATATAAGGTTATTAAAA

27aPro-1239bp ACAATTTGAGTAGTTTCGCCCTGGCAGCGGTTAAAGATGAATTTGAGTCAAATTTGATGTGTTGACGTTCTTTTCATCCAATATGTTGAATGACTTGTGGATGAAAAGTATTAGATGATCCATTTTTCAAATTTCTCTTTCT  
 27bPro-1212bp ACAATTTGAGTAGTTTCGCCCTGGCAGCGGTTAAAGATGAATTTGAGTCAAATTTGATGTGTTGACGTTCTTTTCATCCAATATGTTGAATGACTTGTGGATGAAAAGTATTAGATGATCCATTTTTCAAATTTCTCTTTCT

27aPro-1239bp TCCGCAATGATTCTTAACTTTAAGACTAATTGCCACAATGAGGTTTGAATGTAACGTTTTTCAACAATGTCCACCATCTTACTATAACTTAAGATGACAAGATTTTCAGATTGTTTATACCTATAACCTTGCTAGGACAAATAGAGAA  
 27bPro-1212bp TCCGCAATGATTCTTAACTTTAAGACTAATTGCCACAATGAGGTTTGAATGTAACGTTTTTCAACAATGTCCACCATCTTACTATAACTTAAGATGACAAGATTTTCAGATTGTTTATACCTATAACCTTGCTAGGACAAATAGAGAA

27aPro-1239bp CAATATCATTTCGCATACATTGTTATAATAAGGATTCAAATGGTCTAATTTGTCATGGTTGGTCAATTTACGGAATCTACAAGTCAATCTGCTAGCTAGTCTTTCAAACCAAATGTTTACCTACCTTCTAAGGATATACGGGTGGGA  
 27bPro-1212bp CAATATCATTTCGCATACATTGTTATAATAAGGATTCAAATGGTCTAATTTGTCATGGTTGGTCAATTTACGGAATCTACAAGTCAATCTGCTAGCTAGTCTTTCAAACCAAATGTTTACCTACCTTCTAAGGATATACGGGTGGGA

27aPro-1239bp TTTGGAGGCTCCCAATTCCCTAGAGTTTACAATTCATGTAATATGGAGAAAAAGTCAAGTAAGTATTAAAAATGAAAAATGAAGTGTGGTGTGACGTTGTCACCTTCTCAAACATTGATTAAAAATGTAGACTCGATTATTC  
 27bPro-1212bp TTTGGAGGCTCCCAATTCCCTAGAGTTTACAATTCATGTAATATGGAGAAAAAGTCAAGTAAGTATTAAAAATGAAAAATGAAGTGTGGTGTGACGTTGTCACCTTCTCAAACATTGATTAAAAATGTAGACTCGATTATTC

27aPro-1239bp TAAACGAATTGCAAGCCTCAAATCTCAACCGGATATATTGTTCCATCATGCACAGATGAGAATTTTGTGAATGGATTTTGCACCTTAAACTTGTTCACATCGACTTGAAGGGAGACTATGTTATTGTATACTCTCTGTGTAGCAAGT  
 27bPro-1212bp TAAACGAATTGCAAGCCTCAAATCTCAACCGGATATATTGTTCCATCATGCACAGATGAGAATTTTGTGAATGGATTTTGCACCTTAAACTTGTTCACATCGACTTGAAGGGAGACTATGTTATTGTATACTCTCTGTGTAGCAAGT

27aPro-1239bp TTGTTTCTTGATCCAAAATCACACCTTTCTTCTGGGAAT  
 27bPro-1212bp TTGTTTCTTGATCCAAAATCACACCTTTCTTCTGGGAAT

**Figure S8.** Sequence alignment between *TwTPS27a* promoter from -1115 to +124 bp and *TwTPS27b* promoter from -1088 to +124 bp. The two sequences showed 93.0 % nucleotide identity.

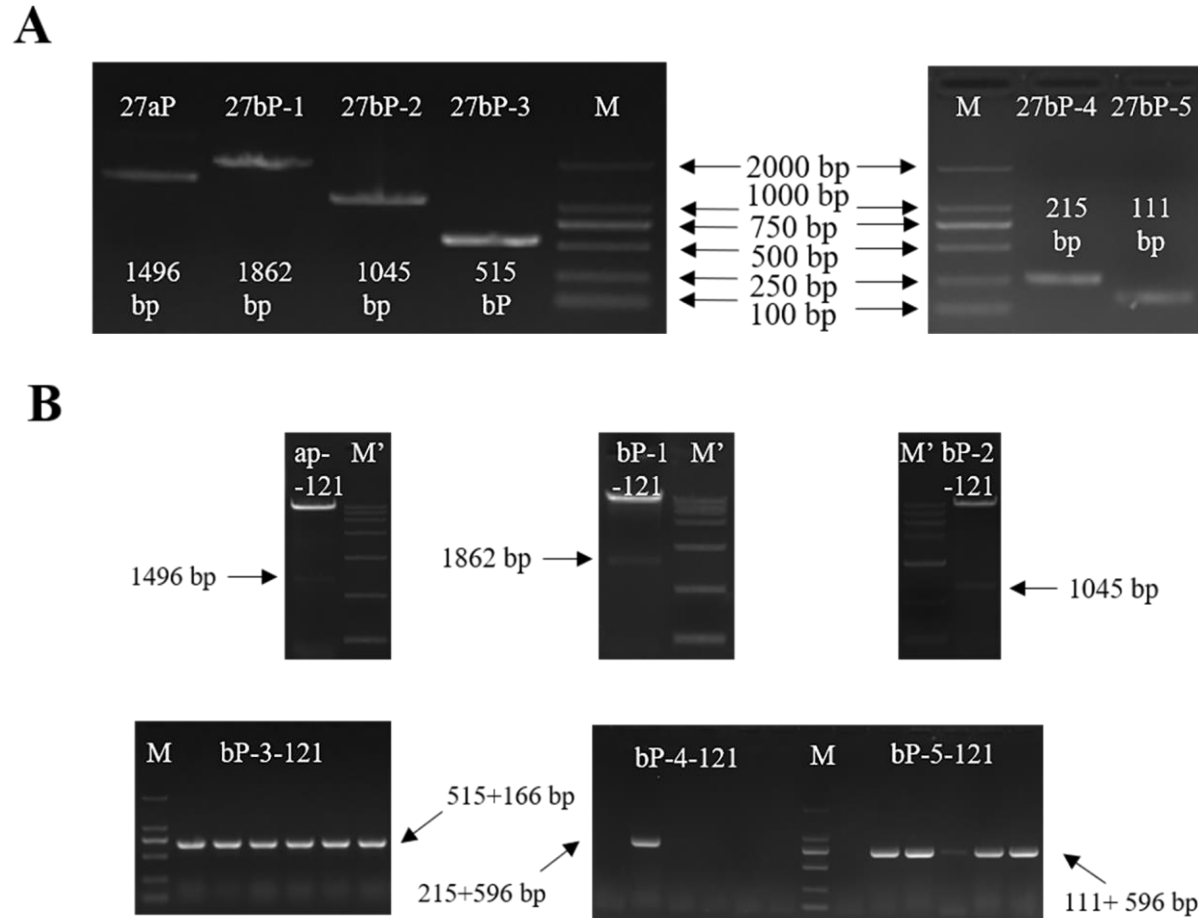

**Figure S9.** Verification of various promoter::GUS vectors. The vectors of aP-121, bP-1-121 and bP-2-121 were verified by double digestion with the restriction enzymes of *Hind* III and *Xba* I. The vector of bP-3-121 was verified by the primers of M13R-4921: RCAGGAAACAGCTATGACC and 121-GUS-R: CAACGCTGATCAATTCCACAG. The vectors of bP-4-121 and bP-5-121 were verified by the primers of 121-cx-F4703: TCGCCCTTTTGTCTTTGGCCCAATAC and 121-cx-R6157: TCACTTCCTGATTATTGACCCACACTTTG.



|                             |                                                               |      |
|-----------------------------|---------------------------------------------------------------|------|
| TwIPS27                     | .....ATGG                                                     | 4    |
| comp34029                   | CTCTGTGTAGCAAGTTTGTTCCTTGCATCCAAAATCACACCTTTCTTCTGGGAATTATGG  | 120  |
| comp37092                   | CTCTGTGTAGCAAGTTTGTTCCTTGCATCCAAAATCACACCTTTCTTCTGGGAATTATGG  | 107  |
| <b><i>TwIPS27</i>-UTR-F</b> |                                                               |      |
| TwIPS27                     | CACCACTGGTTCCTCCCTCACCATCTCACACTTTGTTATACAGACTGGTTC AACAGCCT  | 64   |
| comp34029                   | CACCACTGGTTCCTCCCTCACCATCTCACACTTTGTTATACAGACTGGTTC AACAGCCT  | 180  |
| comp37092                   | CACCACTGGTTCCTCCCTCACCATCTCACACTTTGTTATACAGACTGGTTC AACAGCCT  | 167  |
| <br>                        |                                                               |      |
| TwIPS27                     | TGGTTTCGGGGTAGCCATCGAATTGACCAAAGATGTCATGTCCTCCTTGATCTTTCGCCA  | 1757 |
| comp27356                   | TGGTTTCGGGGTAGCCATCGAATTGACCAAAGATGTCATGTCCTCCTTGATCTTTCGCCA  | 164  |
| comp37092                   | TGGTTTCGGGGTAGCCATCGAATTGACCAAAGATGTCATGTCCTCCTTGATCTTTCGCCA  | 1860 |
| <br>                        |                                                               |      |
| TwIPS27                     | AATCCCAATTTAG.....                                            | 1770 |
| comp27356                   | AATCCCAATTTAGTGACCAATTAGCAAATAAGTCGTTTGGATTTTCGATCTTTGGCAATAT | 224  |
| comp37092                   | AATCCCAATTTAGTGACCAATTAGCAAATAAGTAGTTTGGACATC AATCTTTGGCAATAT | 1920 |
| <b><i>TwIPS27</i>-UTR-R</b> |                                                               |      |

**Figure S10.** Primers designed for cloning the CDSs and gDNA sequences of *TwIPS27a/b*. The primers were designed in the 5'/3'-untranslated region (5'/3'-UTR) of the candidate genes. Single line represents the start/stop codons. The black boxes represent the sense and antisense primers.
